# Supplementary material for: Analysis of Changes in the Expression of Selected Genes from the ABC Family in Patients with Triple-Negative Breast Cancer
Source: MDPI journal article supplement (doi:10.3390/ijms24021257), 2023-01-09
Supplement: s1 [file s1]

| Gene   | pN0     |         | pN1     |         | pN2     |         | pN3     |         | p for multiple comparison                                                                                                          |
|--------|---------|---------|---------|---------|---------|---------|---------|---------|------------------------------------------------------------------------------------------------------------------------------------|
|        | Mean    | SD      | Mean    | SD      | Mean    | SD      | Mean    | SD      |                                                                                                                                    |
| ABCA2  | -0.2929 | 0.75861 | 0.0118  | 1.16756 | -0.0307 | 0.97817 | -0.8259 | 0.60322 | pN0*pN1 = 0.000005*<br>pN0*pN2 = 0.004930*<br>pN0*pN3 = 1.000<br>pN1*pN2 = 0.000000*<br>pN1*pN3 = 0.000000*<br>pN2*pN3 = 0.000000* |
| ABCA3  | -0.0551 | 0.76100 | -0.0916 | 0.73370 | -0.1423 | 1.10679 | -0.3677 | 0.64780 | pN0*pN1 = 1.000<br>pN0*pN2 = 0.000251*<br>pN0*pN3 = 0.000001*<br>pN1*pN2 = 0.004868*<br>pN1*pN3 = 0.000017*<br>pN2*pN3 =0.256      |
| ABCB1  | -0.3016 | 0.96989 | -0.2646 | 1.06238 | -0.1401 | 1.28819 | -0.7911 | 0.87265 | pN0*pN1 = 1.000<br>pN0*pN2 = 1.000<br>pN0*pN3 = 0.000000*<br>pN1*pN2 = 1.000<br>pN1*pN3 = 0.000000*<br>pN2*pN3 = 0.000000*         |
| ABCB4  | -0.3588 | 0.80753 | -0.4440 | 1.02572 | -0.1684 | 1.76358 | -0.9646 | 0.88671 | pN0*pN1 = 0.005667*<br>pN0*pN2 = 0.000963*<br>pN0*pN3 = 0.000000*<br>pN1*pN2 = 1.000<br>pN1*pN3 = 0.000006*<br>pN2*pN3 = 0.001317* |
| ABCB9  | 0.0165  | 0.87285 | 0.0777  | 0.91056 | -0.3468 | 0.80542 | -0.4396 | 0.75689 | pN0*pN1 = 1.000<br>pN0*pN2 = 0.000000*<br>pN0*pN3 = 0.000000*<br>pN1*pN2 = 0.000000*<br>pN1*pN3 = 0.000000*<br>pN2*pN3 = 1.000     |
| ABCC10 | -0.0217 | 0.62406 | -0.1013 | 0.63770 | -0.1016 | 0.72526 | -0.2149 | 0.58081 | pN0*pN1 = 0.039046*<br>pN0*pN2 = 0.738<br>pN0*pN3 = 0.000503*<br>pN1*pN2 = 1.000<br>pN1*pN3 = 0.123<br>pN2*pN3 = 0.094             |
| ABCC11 | -0.2326 | 1.68186 | -0.3431 | 1.57369 | 0.2450  | 1.55241 | -1.2427 | 1.06935 | pN0*pN1 = 1.000<br>pN0*pN2 = 0.000004*<br>pN0*pN3 = 0.000000*<br>pN1*pN2 = 0.000000*<br>pN1*pN3 = 0.000000*<br>pN2*pN3 = 0.000000* |
| ABCC1  | -0.1566 | 0.66150 | -0.1016 | 0.71148 | -0.3185 | 0.73581 | -0.5409 | 0.59517 | pN0*pN1 = 0.327<br>pN0*pN2 = 0.000077*<br>pN0*pN3 = 0.000000*<br>pN1*pN2 = 0.000000*<br>pN1*pN3 = 0.000000*<br>pN2*pN3 = 0.001062  |
| ABCC2  | -0.1683 | 1.09339 | -0.2491 | 0.96335 | 0.0856  | 1.08100 | -0.8883 | 0.80209 | pN0*pN1 = 1.000<br>pN0*pN2 = 0.005331*<br>pN0*pN3 = 0.000000*<br>pN1*pN2 = 0.003051*<br>pN1*pN3 = 0.000000*<br>pN2*pN3 = 0.000000* |
| ABCC3  | 0.0616  | 0.77072 | 0.0439  | 0.70771 | 0.0953  | 0.97695 | -0.3272 | 0.66940 | pN0*pN1 = 1.000<br>pN0*pN2 = 0.395<br>pN0*pN3 = 0.000000*<br>pN1*pN2 = 0.200<br>pN1*pN3 = 0.000001*<br>pN2*pN3 = 0.000000*         |
| ABCC4  | 0.0974  | 0.90232 | 0.0693  | 0.91088 | -0.6419 | 1.04390 | -0.5391 | 0.84510 | pN0*pN1 = 1.000<br>pN0*pN2 = 0.000000*<br>pN0*pN3 = 0.000000*<br>pN1*pN2 = 0.000000*<br>pN1*pN3 = 0.000000*<br>pN2*pN3 = 1.000     |
| ABCC5  | -0.1972 | 0.95652 | -0.2255 | 0.90709 | 0.0010  | 1.23445 | -0.7679 | 0.82960 | pN0*pN1 = 1.000<br>pN0*pN2 = 0.263                                                                                                 |

[illegible]
