# Supplementary material for: Analysis of Changes in the Expression of Selected Genes from the ABC Family in Patients with Triple-Negative Breast Cancer
Source: MDPI journal article supplement (doi:10.3390/ijms24021257), 2023-01-09
Supplement: s1 [file s1]

**Table S2.** The level of significance of the difference in the expression of the studied genes in patients classified into pN0, pN1, pN2, pN3 groups by the metastases to the regional lymph nodes obtained from the Ualcan database

| Gene         | p for multiple comparison                                                                                                                             |
|--------------|-------------------------------------------------------------------------------------------------------------------------------------------------------|
| <i>ABCA2</i> | pN0*pN1= 2.056300E-02*<br>pN0*pN2= 1.076240E-01<br>pN0*pN3= 7.832600E-01<br>pN1*pN2= 9.599800E-01<br>pN1*pN3= 1.975800E-01<br>pN2*pN3= 2.838000E-01   |
| <i>ABCA3</i> | pN0*pN1= 3.642600E-01<br>pN0*pN2= 7.143800E-01<br>pN0*pN3= 4.725000E-01<br>pN1*pN2= 3.237800E-01<br>pN1*pN3= 2.324200E-01<br>pN2*pN3= 7.173600E-01    |
| <i>ABCB1</i> | pN0*pN1= 1.865030E-01<br>pN0*pN2= 2.541200E-01<br>pN0*pN3= 2.955800E-02*<br>pN1*pN2= 9.331600E-01<br>pN1*pN3= 1.633380E-01<br>pN2*pN3= 2.128000E-01   |
| <i>ABCB4</i> | pN0*pN1= 9.786400E-01<br>pN0*pN2= 2.532200E-01<br>pN0*pN3= 4.893600E-01<br>pN1*pN2= 2.181200E-01<br>pN1*pN3= 4.667600E-01<br>pN2*pN3= 1.314810E-01    |
| <i>ABCB9</i> | pN0*pN1= 7.196100E-02<br>pN0*pN2= 2.118800E-03*<br>pN0*pN3= 9.435600E-03*<br>pN1*pN2= 4.883900E-02*<br>pN1*pN3= 1.794000E-01<br>pN2*pN3= 6.776200E-01 |
| <i>ABCC1</i> | pN0*pN1= 5.647400E-01<br>pN0*pN2= 5.022200E-01<br>pN0*pN3= 9.831600E-01<br>pN1*pN2= 2.942000E-01<br>pN1*pN3= 7.104200E-01<br>pN2*pN3= 6.317800E-01    |

|               |                                                                                                                                                                                                                |
|---------------|----------------------------------------------------------------------------------------------------------------------------------------------------------------------------------------------------------------|
| <i>ABCC2</i>  | $pN0 \cdot pN1 = 1.595620E-01$<br>$pN0 \cdot pN2 = 8.430600E-01$<br>$pN0 \cdot pN3 = 4.282400E-01$<br>$pN1 \cdot pN2 = 3.422600E-01$<br>$pN1 \cdot pN3 = 8.944000E-01$<br>$pN2 \cdot pN3 = 4.711000E-01$       |
| <i>ABCC3</i>  | $pN0 \cdot pN1 = 7.804400E-01$<br>$pN0 \cdot pN2 = 9.330800E-01$<br>$pN0 \cdot pN3 = 4.933800E-02^*$<br>$pN1 \cdot pN2 = 9.161800E-01$<br>$pN1 \cdot pN3 = 8.744100E-02$<br>$pN2 \cdot pN3 = 1.169820E-01$     |
| <i>ABCC4</i>  | $pN0 \cdot pN1 = 3.990800E-01$<br>$pN0 \cdot pN2 = 1.984000E-01$<br>$pN0 \cdot pN3 = 6.776600E-01$<br>$pN1 \cdot pN2 = 4.150000E-01$<br>$pN1 \cdot pN3 = 8.853400E-01$<br>$pN2 \cdot pN3 = 4.045600E-01$       |
| <i>ABCC5</i>  | $pN0 \cdot pN1 = 8.204700E-03^*$<br>$pN0 \cdot pN2 = 5.581200E-01$<br>$pN0 \cdot pN3 = 6.538400E-01$<br>$pN1 \cdot pN2 = 7.254000E-02$<br>$pN1 \cdot pN3 = 3.888400E-02^*$<br>$pN2 \cdot pN3 = 8.820800E-01$   |
| <i>ABCC6</i>  | $pN0 \cdot pN1 = 2.381600E-01$<br>$pN0 \cdot pN2 = 9.054200E-01$<br>$pN0 \cdot pN3 = 2.699600E-03^*$<br>$pN1 \cdot pN2 = 2.708400E-01$<br>$pN1 \cdot pN3 = 6.283200E-03^*$<br>$pN2 \cdot pN3 = 5.382200E-02$   |
| <i>ABCC10</i> | $pN0 \cdot pN1 = 2.147500E-02^*$<br>$pN0 \cdot pN2 = 1.443250E-03^*$<br>$pN0 \cdot pN3 = 6.508400E-02$<br>$pN1 \cdot pN2 = 2.386200E-02^*$<br>$pN1 \cdot pN3 = 4.444400E-01$<br>$pN2 \cdot pN3 = 1.950810E-01$ |
| <i>ABCC11</i> | $pN0 \cdot pN1 = 1.100810E-01$<br>$pN0 \cdot pN2 = 4.653600E-01$<br>$pN0 \cdot pN3 = 1.450310E-02^*$<br>$pN1 \cdot pN2 = 1.108220E-01$<br>$pN1 \cdot pN3 = 2.216200E-03^*$<br>$pN2 \cdot pN3 = 1.453790E-01$   |
| <i>ABCG2</i>  | $pN0 \cdot pN1 = 7.565600E-01$                                                                                                                                                                                 |

|  |                                                                                                                                      |
|--|--------------------------------------------------------------------------------------------------------------------------------------|
|  | <p>pN0*pN2= 6.357200E-01<br/>pN0*pN3= 6.976800E-01<br/>pN1*pN2= 4.294400E-01<br/>pN1*pN3= 8.898600E-01<br/>pN2*pN3= 4.077200E-01</p> |
|--|--------------------------------------------------------------------------------------------------------------------------------------|
